# Supplementary material
Source: publisher site journal article supplement (https://www.dovepress.com/article/supplementary_file/559490/559490_Supplementary%20S1_1.xlsx)
Supplement: Supplementary file 1 [file 559490_Supplementary%20S1_1.xlsx]

## Sheet: Research DATA
					Supplementary Table S1 Raw data for demographic variables, bacterial isolates, antimicrobial susceptibility test and biofilm formation results
ID	AGE	Gender	Education level	Marital s.	UTIs Hist.	Underlying condition	Hospitalization	Catheter use	AntisepticsinGenitals.	Pregnancy	Isolated bacteria	Nitrofurantoin	Trimetoprim(SXT)	Ciprofloxacin	Ampicillin	Amoxicillin	Amoxy-clav	Cefixime	Ceftazidime	Meropenem	Gentamycin	Biofilm production status
R01	23	F	University	Single	No	None	No	No	No	No	No growth	NA	NA	NA	NA	NA	NA	NA	NA	NA	NA	NA
R02	41	M	None	Married	No	Hypertension	No	No	No	NA	No growth	NA	NA	NA	NA	NA	NA	NA	NA	NA	NA	NA
R03	26	F	Primary	Single	No	None	No	No	No	No	No growth	NA	NA	NA	NA	NA	NA	NA	NA	NA	NA	NA
R04	32	F	University	Married	Yes	None	Yes	No	No	Yes	E.coli	R	R	S	R	R	I	R	I	R	S	Positive
R05	35	F	None	Married	No	None	No	No	No	No	No growth	NA	NA	NA	NA	NA	NA	NA	NA	NA	NA	NA
R06	30	F	Primary	Single	No	None	No	No	No	No	No growth	NA	NA	NA	NA	NA	NA	NA	NA	NA	NA	NA
R07	21	M	University	Single	No	None	Yes	No	No	NA	No growth	NA	NA	NA	NA	NA	NA	NA	NA	NA	NA	NA
R08	33	F	Primary	Married	No	None	Yes	No	No	Yes	E.coli	R	R	S	R	R	R	R	S	S	S	Positive
R09	52	F	None	Widower	No	None	No	No	No	No	No growth	NA	NA	NA	NA	NA	NA	NA	NA	NA	NA	NA
R10	34	F	Primary	Married	Yes	None	Yes	No	No	Yes	Other	NA	NA	NA	NA	NA	NA	NA	NA	NA	NA	NA
R11	19	M	Secondary	Single	No	None	No	No	No	NA	No growth	NA	NA	NA	NA	NA	NA	NA	NA	NA	NA	NA
R12	64	F	None	Married	No	Diabetes	Yes	No	No	No	E.coli	R	R	S	R	S	S	S	S	S	I	Negative
R13	31	F	None	Married	No	None	No	No	No	No	No growth	NA	NA	NA	NA	NA	NA	NA	NA	NA	NA	NA
R14	42	M	University	Married	Yes	Kidney disease	Yes	No	No	NA	E.coli	S	R	S	R	I	S	S	S	S	S	Negative
R15	69	F	None	Married	No	None	Yes	Yes	No	No	No growth	NA	NA	NA	NA	NA	NA	NA	NA	NA	NA	NA
R16	21	F	Secondary	Single	No	None	No	No	No	No	No growth	NA	NA	NA	NA	NA	NA	NA	NA	NA	NA	NA
R17	45	M	None	Married	No	Hypertension	No	No	No	NA	Other	NA	NA	NA	NA	NA	NA	NA	NA	NA	NA	NA
R18	27	F	Primary	Married	No	None	No	No	No	No	No growth	NA	NA	NA	NA	NA	NA	NA	NA	NA	NA	NA
R19	23	M	University	Single	No	None	No	No	No	NA	Other	NA	NA	NA	NA	NA	NA	NA	NA	NA	NA	NA
R20	28	F	Primary	Married	No	None	No	No	No	Yes	No growth	NA	NA	NA	NA	NA	NA	NA	NA	NA	NA	NA
R21	33	F	Secondary	Married	No	None	No	No	No	No	No growth	NA	NA	NA	NA	NA	NA	NA	NA	NA	NA	NA
R22	20	M	Secondary	Single	No	None	No	No	Yes	NA	No growth	NA	NA	NA	NA	NA	NA	NA	NA	NA	NA	NA
R23	49	F	Secondary	Married	No	None	No	No	No	No	E.coli	I	R	S	I	R	R	S	R	S	S	Positive
R24	21	F	Primary	Single	No	None	No	No	No	No	Other	NA	NA	NA	NA	NA	NA	NA	NA	NA	NA	NA
R25	42	F	University	Married	No	None	No	No	No	No	No growth	NA	NA	NA	NA	NA	NA	NA	NA	NA	NA	NA
R26	21	F	Secondary	Single	No	None	No	No	Yes	No	No growth	NA	NA	NA	NA	NA	NA	NA	NA	NA	NA	NA
R27	38	M	University	Married	No	None	No	No	No	NA	No growth	NA	NA	NA	NA	NA	NA	NA	NA	NA	NA	NA
R28	23	M	None	Single	No	None	No	No	No	NA	No growth	NA	NA	NA	NA	NA	NA	NA	NA	NA	NA	NA
R29	73	M	None	Married	No	None	Yes	No	No	NA	Other	NA	NA	NA	NA	NA	NA	NA	NA	NA	NA	NA
R30	37	F	None	Married	No	None	No	No	No	Yes	No growth	NA	NA	NA	NA	NA	NA	NA	NA	NA	NA	NA
R31	69	M	None	Married	No	None	No	No	No	NA	Other	NA	NA	NA	NA	NA	NA	NA	NA	NA	NA	NA
R32	58	F	None	Divorced	No	None	No	No	No	No	No growth	NA	NA	NA	NA	NA	NA	NA	NA	NA	NA	NA
R33	55	M	Primary	Married	No	None	No	No	Yes	NA	No growth	NA	NA	NA	NA	NA	NA	NA	NA	NA	NA	NA
R34	23	F	Secondary	Married	No	Hypertension	No	No	Yes	No	No growth	NA	NA	NA	NA	NA	NA	NA	NA	NA	NA	NA
R35	32	F	University	Married	Yes	None	No	No	No	No	Other	NA	NA	NA	NA	NA	NA	NA	NA	NA	NA	NA
R36	25	F	Secondary	Single	Yes	None	No	No	No	No	No growth	NA	NA	NA	NA	NA	NA	NA	NA	NA	NA	NA
R37	22	M	Primary	Single	No	None	No	No	No	NA	No growth	NA	NA	NA	NA	NA	NA	NA	NA	NA	NA	NA
R38	26	F	University	Single	No	None	No	No	No	No	No growth	NA	NA	NA	NA	NA	NA	NA	NA	NA	NA	NA
R39	31	F	Primary	Married	No	Kidney disease	No	No	Yes	Yes	E.coli	I	R	S	I	R	S	S	S	S	S	Negative
R40	39	F	None	Married	Yes	None	No	No	Yes	Yes	E.coli	R	R	S	R	R	S	S	R	S	R	Positive
R41	66	M	Primary	Married	No	Kidney disease	No	Yes	Yes	NA	No growth	NA	NA	NA	NA	NA	NA	NA	NA	NA	NA	NA
R42	35	M	University	Married	Yes	None	No	No	No	NA	No growth	NA	NA	NA	NA	NA	NA	NA	NA	NA	NA	NA
R43	36	F	Primary	Married	Yes	None	No	No	No	No	No growth	NA	NA	NA	NA	NA	NA	NA	NA	NA	NA	NA
R44	67	M	None	Married	Yes	None	No	No	No	NA	No growth	NA	NA	NA	NA	NA	NA	NA	NA	NA	NA	NA
R45	50	F	Primary	Married	Yes	None	Yes	No	Yes	No	No growth	NA	NA	NA	NA	NA	NA	NA	NA	NA	NA	NA
R46	58	F	University	Married	Yes	None	Yes	No	No	Yes	E.coli	R	R	S	R	R	S	R	R	S	S	Positive
R47	25	F	University	Married	No	None	No	No	Yes	Yes	No growth	NA	NA	NA	NA	NA	NA	NA	NA	NA	NA	NA
R48	60	F	Primary	Widower	No	Kidney disease	No	No	Yes	No	No growth	NA	NA	NA	NA	NA	NA	NA	NA	NA	NA	NA
R49	27	F	University	Single	No	None	No	No	No	No	No growth	NA	NA	NA	NA	NA	NA	NA	NA	NA	NA	NA
R50	43	M	Primary	Married	No	None	No	No	No	No	No growth	NA	NA	NA	NA	NA	NA	NA	NA	NA	NA	NA
R51	34	F	University	Married	Yes	None	No	No	No	Yes	Other	NA	NA	NA	NA	NA	NA	NA	NA	NA	NA	NA
R52	28	F	University	Married	No	None	Yes	No	No	Yes	No growth	NA	NA	NA	NA	NA	NA	NA	NA	NA	NA	NA
R53	42	M	Primary	Widower	No	Kidney disease	No	No	No	NA	No growth	NA	NA	NA	NA	NA	NA	NA	NA	NA	NA	NA
R54	57	F	Primary	Married	Yes	Hypertension	Yes	Yes	No	No	No growth	NA	NA	NA	NA	NA	NA	NA	NA	NA	NA	NA
R55	32	F	None	Married	No	None	Yes	No	No	Yes	No growth	NA	NA	NA	NA	NA	NA	NA	NA	NA	NA	NA
R56	22	M	University	Single	No	None	No	No	No	NA	No growth	NA	NA	NA	NA	NA	NA	NA	NA	NA	NA	NA
R57	36	M	Primary	Married	No	None	Yes	No	No	NA	E.coli	S	S	S	R	R	S	I	S	S	S	Negative
R58	34	F	University	Married	No	None	No	No	No	No	No growth	NA	NA	NA	NA	NA	NA	NA	NA	NA	NA	NA
R59	30	F	Primary	Single	No	None	No	No	No	No	No growth	NA	NA	NA	NA	NA	NA	NA	NA	NA	NA	NA
R60	58	M	University	Divorced	No	None	Yes	No	No	NA	Other	R	R	S	R	S	S	I	R	S	NA	NA
R61	64	M	None	Married	Yes	Diabetes	Yes	No	No	NA	E.coli	R	R	S	R	R	I	R	S	S	S	Positive
R62	19	F	University	Single	No	None	No	No	No	No	No growth	NA	NA	NA	NA	NA	NA	NA	NA	NA	NA	NA
R63	21	F	Primary	Single	No	None	No	No	No	No	No growth	NA	NA	NA	NA	NA	NA	NA	NA	NA	NA	NA
R64	46	M	Primary	Married	No	None	No	No	No	NA	No growth	NA	NA	NA	NA	NA	NA	NA	NA	NA	NA	NA
R65	33	F	University	Married	No	None	No	No	No	Yes	E.coli	R	S	S	R	R	S	S	R	S	NA	Negative
R66	69	F	University	Married	No	Kidney disease	No	Yes	No	No	E.coli	R	R	S	R	R	I	R	R	S	R	Positive
R67	29	F	Primary	Married	No	None	No	No	No	No	No growth	NA	NA	NA	NA	NA	NA	NA	NA	NA	NA	NA
R68	32	F	Primary	Divorced	Yes	None	No	No	No	Yes	Other	NA	NA	NA	NA	NA	NA	NA	NA	NA	NA	NA
R69	23	M	University	Married	No	None	Yes	No	No	No	No growth	NA	NA	NA	NA	NA	NA	NA	NA	NA	NA	NA
R70	62	F	None	Married	No	None	No	No	No	No	Other	NA	NA	NA	NA	NA	NA	NA	NA	NA	NA	NA
R71	47	F	Primary	Married	No	None	No	No	No	No	No growth	NA	NA	NA	NA	NA	NA	NA	NA	NA	NA	NA
R72	33	F	University	Married	Yes	None	No	No	No	Yes	Other	NA	NA	NA	NA	NA	NA	NA	NA	NA	NA	NA
R73	25	M	University	Single	No	None	No	No	No	NA	No growth	NA	NA	NA	NA	NA	NA	NA	NA	NA	NA	NA
R74	71	F	None	Married	No	None	No	No	No	No	E.coli	R	S	S	R	I	S	S	S	S	S	Negative
R75	29	M	Secondary	Single	No	None	No	No	No	No	No growth	NA	NA	NA	NA	NA	NA	NA	NA	NA	NA	NA
R76	31	M	University	Married	No	None	Yes	No	No	No	No growth	NA	NA	NA	NA	NA	NA	NA	NA	NA	NA	NA
R77	35	F	Secondary	Married	No	None	No	No	No	Yes	E.coli	R	I	S	R	R	S	S	S	S	S	Negative
R78	33	M	None	Married	No	None	Yes	No	No	NA	No growth	NA	NA	NA	NA	NA	NA	NA	NA	NA	NA	NA
R79	38	M	None	Married	No	None	No	No	No	Yes	Other	NA	NA	NA	NA	NA	NA	NA	NA	NA	NA	NA
R80	57	M	None	Married	No	Hypertension	No	No	No	No	E.coli	R	R	S	R	R	R	R	S	S	S	Positive
R81	25	M	Primary	Married	No	Kidney disease	No	No	No	NA	No growth	NA	NA	NA	NA	NA	NA	NA	NA	NA	NA	NA
R82	44	F	University	Married	Yes	None	No	No	No	No	No growth	NA	NA	NA	NA	NA	NA	NA	NA	NA	NA	NA
R83	38	F	University	Married	No	None	No	No	No	No	No growth	NA	NA	NA	NA	NA	NA	NA	NA	NA	NA	NA
R84	26	F	Secondary	Married	Yes	None	No	No	Yes	Yes	No growth	NA	NA	NA	NA	NA	NA	NA	NA	NA	NA	NA
R85	62	M	None	Married	No	None	No	No	No	NA	No growth	NA	NA	NA	NA	NA	NA	NA	NA	NA	NA	NA
R86	20	F	Primary	Married	No	None	No	No	No	No	No growth	NA	NA	NA	NA	NA	NA	NA	NA	NA	NA	NA
R87	25	F	Primary	Married	No	None	No	No	Yes	No	E.coli	R	I	S	R	R	S	I	S	S	S	Negative
R88	40	F	University	Divorced	No	None	No	No	No	No	No growth	NA	NA	NA	NA	NA	NA	NA	NA	NA	NA	NA
R89	27	F	Primary	Married	No	None	No	No	No	Yes	No growth	NA	NA	NA	NA	NA	NA	NA	NA	NA	NA	NA
R90	31	M	Primary	Married	No	None	No	No	No	NA	No growth	NA	NA	NA	NA	NA	NA	NA	NA	NA	NA	NA
R91	44	F	University	Divorced	No	None	No	No	Yes	No	E.coli	R	I	S	S	R	S	S	S	S	S	Negative
R92	76	M	Primary	Married	No	None	No	No	No	NA	E.coli	R	I	S	R	R	S	S	S	S	S	Negative
R93	32	M	None	Married	No	None	No	No	No	NA	Other	NA	NA	NA	NA	NA	NA	NA	NA	NA	NA	NA
R94	22	F	Secondary	Single	Yes	None	No	No	No	No	No growth	NA	NA	NA	NA	NA	NA	NA	NA	NA	NA	NA
R95	38	F	University	Married	Yes	None	No	No	Yes	Yes	E.coli	S	R	S	R	R	S	I	S	S	S	Negative
R96	71	F	None	Married	No	None	No	No	No	No	No growth	NA	NA	NA	NA	NA	NA	NA	NA	NA	NA	NA
R97	36	F	Primary	Married	No	None	Yes	No	Yes	No	E.coli	I	R	S	R	I	S	S	S	S	S	Negative
R98	35	M	University	Married	No	None	No	No	No	No	No growth	NA	NA	NA	NA	NA	NA	NA	NA	NA	NA	NA
R99	21	F	Primary	Single	No	None	No	No	No	No	No growth	NA	NA	NA	NA	NA	NA	NA	NA	NA	NA	NA
R100	38	F	Primary	Married	No	None	Yes	No	No	Yes	No growth	NA	NA	NA	NA	NA	NA	NA	NA	NA	NA	NA
R101	73	M	None	Married	No	Kidneydisease	Yes	Yes	No	No	E.coli	R	R	S	R	R	I	R	I	S	R	Positive
R102	48	M	Primary	Married	No	None	No	Yes	No	NA	No growth	NA	NA	NA	NA	NA	NA	NA	NA	NA	NA	NA
R103	31	F	Primary	Married	No	None	No	No	No	yes	No growth	NA	NA	NA	NA	NA	NA	NA	NA	NA	NA	NA
R104	19	M	Secondary	Single	No	None	No	No	No	NA	No growth	NA	NA	NA	NA	NA	NA	NA	NA	NA	NA	NA
R105	64	F	None	Married	No	None	No	No	No	No	E.coli	R	R	S	R	R	S	I	S	S	R	Positive
R106	46	F	Primary	Married	No	None	No	No	No	No	No growth	NA	NA	NA	NA	NA	NA	NA	NA	NA	NA	NA
R107	32	F	Primary	Married	No	None	No	No	No	Yes	E.coli	R	S	S	R	R	S	S	S	S	S	Negative
R108	38	F	Primary	Married	No	None	No	No	Yes	No	No growth	NA	NA	NA	NA	NA	NA	NA	NA	NA	NA	NA
R109	31	M	None	Single	No	None	Yes	No	No	NA	Other	NA	NA	NA	NA	NA	NA	NA	NA	NA	NA	NA
R110	29	M	Primary	Married	No	None	No	No	No	NA	No growth	NA	NA	NA	NA	NA	NA	NA	NA	NA	NA	NA
R111	28	F	Primary	Married	No	None	No	No	No	Yes	No growth	NA	NA	NA	NA	NA	NA	NA	NA	NA	NA	NA
R112	58	F	None	Married	No	None	No	No	No	No	E.coli	R	R	S	R	R	I	S	S	S	R	Positive
R113	25	F	University	Married	No	None	No	No	No	Yes	E.coli	R	R	S	R	R	S	R	R	S	S	Positive
R114	22	F	Secondary	Single	Yes	None	No	No	No	Yes	No growth	NA	NA	NA	NA	NA	NA	NA	NA	NA	NA	NA
R115	36	M	Primary	Married	No	None	Yes	No	No	NA	No growth	NA	NA	NA	NA	NA	NA	NA	NA	NA	NA	NA
R116	18	F	Secondary	Single	No	None	No	No	No	No	No growth	NA	NA	NA	NA	NA	NA	NA	NA	NA	NA	NA
R117	48	F	Primary	Married	No	None	Yes	No	No	No	Other	NA	NA	NA	NA	NA	NA	NA	NA	NA	NA	NA
R118	67	F	None	Married	Yes	None	No	No	No	No	E.coli	R	R	S	R	R	R	S	S	S	R	Positive
R119	35	F	Primary	Married	Yes	None	No	No	No	Yes	No growth	NA	NA	NA	NA	NA	NA	NA	NA	NA	NA	NA
R120	48	M	University	Married	No	None	Yes	No	No	No	Other	NA	NA	NA	NA	NA	NA	NA	NA	NA	NA	NA
R121	33	F	Secondary	Married	No	None	No	No	No	No	E.coli	R	I	S	R	R	I	S	S	S	S	Negative
R122	36	M	None	Single	No	None	Yes	No	No	NA	No growth	NA	NA	NA	NA	NA	NA	NA	NA	NA	NA	NA
R123	37	M	Primary	Married	No	None	No	No	No	NA	E.coli	R	I	S	R	S	I	S	R	S	S	Negative
R124	60	F	None	Widower	No	Kidney disease	No	No	Yes	No	No growth	NA	NA	NA	NA	NA	NA	NA	NA	NA	NA	NA
R125	61	F	None	Widower	No	None	No	No	No	No	No growth	NA	NA	NA	NA	NA	NA	NA	NA	NA	NA	NA
R126	22	M	Primary	Single	No	None	Yes	No	No	NA	No growth	NA	NA	NA	NA	NA	NA	NA	NA	NA	NA	NA
R127	37	F	Primary	Married	No	None	No	No	No	Yes	E.coli	R	I	S	R	R	S	S	S	S	S	Negative
R128	50	F	None	Married	No	None	No	No	No	No	E.coli	R	R	S	R	R	R	I	S	S	R	Positive
R129	38	F	Primary	Married	No	None	No	No	No	Yes	No growth	NA	NA	NA	NA	NA	NA	NA	NA	NA	NA	NA
R130	21	F	University	Single	No	None	No	No	No	No	E.coli	R	R	S	R	R	S	S	S	S	S	Negative
R131	49	F	Primary	Married	No	None	No	No	No	No	No growth	NA	NA	NA	NA	NA	NA	NA	NA	NA	NA	NA
R132	31	F	University	Married	Yes	None	No	No	No	Yes	Other	NA	NA	NA	NA	NA	NA	NA	NA	NA	NA	NA
R133	33	F	Secondary	Married	Yes	None	No	No	No	Yes	E.coli	S	R	S	I	R	S	I	S	S	S	Negative
R134	69	F	Primary	Married	No	None	No	No	No	No	No growth	NA	NA	NA	NA	NA	NA	NA	NA	NA	NA	NA
R135	79	M	None	Married	No	None	Yes	No	Yes	NA	E.coli	R	S	S	R	R	S	R	S	S	S	Positive
R136	25	F	Primary	Married	No	None	No	No	Yes	Yes	No growth	NA	NA	NA	NA	NA	NA	NA	NA	NA	NA	NA
R137	27	F	Primary	Single	No	None	Yes	No	No	No	No growth	NA	NA	NA	NA	NA	NA	NA	NA	NA	NA	NA
R138	43	M	University	Married	No	None	No	No	No	No	No growth	NA	NA	NA	NA	NA	NA	NA	NA	NA	NA	NA
R139	34	F	University	Married	Yes	None	No	No	No	Yes	Other	NA	NA	NA	NA	NA	NA	NA	NA	NA	NA	NA
R140	28	F	Primary	Married	No	None	Yes	No	No	Yes	No growth	NA	NA	NA	NA	NA	NA	NA	NA	NA	NA	NA
R141	42	M	None	Widower	No	Hypertension	No	No	No	NA	E.coli	S	R	S	I	R	S	I	S	S	S	Negative
R142	31	F	University	Married	No	None	Yes	Yes	No	No	No growth	NA	NA	NA	NA	NA	NA	NA	NA	NA	NA	NA
R143	19	F	Primary	Single	No	None	No	No	No	No	No growth	NA	NA	NA	NA	NA	NA	NA	NA	NA	NA	NA
R144	65	M	None	Married	No	Hypertension	No	No	No	NA	E.coli	I	R	S	I	R	R	S	R	S	R	Positive
R145	26	F	University	Married	No	None	No	No	No	No	No growth	NA	NA	NA	NA	NA	NA	NA	NA	NA	NA	NA
R146	21	M	Primary	Single	No	None	No	No	No	NA	E.coli	R	R	S	R	R	I	S	S	S	S	Negative
R147	35	F	Secondary	Married	Yes	None	No	No	No	Yes	No growth	NA	NA	NA	NA	NA	NA	NA	NA	NA	NA	NA
R148	48	M	Primary	Married	No	None	Yes	No	No	No	Other	NA	NA	NA	NA	NA	NA	NA	NA	NA	NA	NA
R149	61	F	None	Widower	No	None	No	No	No	No	No growth	NA	NA	NA	NA	NA	NA	NA	NA	NA	NA	NA
R150	22	M	University	Single	No	None	Yes	No	No	NA	No growth	NA	NA	NA	NA	NA	NA	NA	NA	NA	NA	NA
R151	48	M	None	Married	No	None	Yes	No	No	No	E.coli	R	R	S	I	R	I	S	S	S	S	Negative
				Legend:
			Supplementary Table S1 contains the raw data used for analysis in the study including urine specimens' identifiers/or codes, participants demographics, isolated bacteria, antimicrobial
			susceptibility test results and biofilm formation status.
			NA: Not applicable
			R: Resistant, I: Intermediate, S: Sensitive
			Susceptibility interpretations were done following CLSI guidelines
